# Supplementary material
Source: MDPI journal article supplement (https://www.mdpi.com/2673-7655/3/1/5)
Supplement: s1 [file s1]

**Table S1.** Description of data quality.

| Strain   | Sample Name | clean data(G) | Q30(%) | GC(%) |
|----------|-------------|---------------|--------|-------|
| GH308    | GH308CK_1   | 4.4           | 91.4   | 60.4  |
|          | GH308CK_2   | 5.8           | 91.6   | 60.1  |
|          | GH308CK_3   | 4.7           | 91.6   | 59.0  |
| GH308MIB | GH308MIB_1  | 4.8           | 91.3   | 59.8  |
|          | GH308MIB_2  | 5.8           | 91.3   | 59.3  |
|          | GH308MIB_3  | 5.2           | 90.9   | 60.3  |
| GH308IB  | GH308IB_1   | 4.3           | 92.2   | 59.9  |
|          | GH308IB_2   | 4.4           | 91.2   | 61.2  |
|          | GH308IB_3   | 4.7           | 91.4   | 60.1  |
| HR05CK   | HR05CK_1    | 4.9           | 90.6   | 59.5  |
|          | HR05CK_2    | 4.8           | 91.1   | 59.3  |
|          | HR05CK_3    | 5.1           | 91.5   | 57.2  |
| HR05MIB  | HR05MIB_1   | 5.3           | 91.3   | 55.9  |
|          | HR05MIB_2   | 5.2           | 91     | 60.4  |
|          | HR05MIB_3   | 4.3           | 91.5   | 60.5  |
| HR05IB   | HR05IB_1    | 4.3           | 91     | 60.5  |
|          | HR05IB_2    | 5.1           | 91.3   | 60.1  |
|          | HR05IB_3    | 4.4           | 91     | 60.2  |
| TN1CK    | TN1CK_1     | 5.2           | 92.2   | 60    |
|          | TN1CK_2     | 4.8           | 91.9   | 60.3  |
|          | TN1CK_3     | 4.8           | 91.8   | 58.2  |
| TN1MIB   | TN1MIB_1    | 4.9           | 90.8   | 59.9  |
|          | TN1MIB_2    | 4.8           | 92.1   | 58.8  |
|          | TN1MIB_3    | 4.95          | 91.7   | 59.7  |
| TN1IB    | TN1IB_1     | 4.5           | 91.3   | 59.9  |
|          | TN1IB_2     | 4.2           | 91.8   | 60.2  |
|          | TN1IB_3     | 3.5           | 91.7   | 56.7  |
